# Supplementary material
Source: publisher site journal article supplement (http://static.cambridge.org/content/id/urn:cambridge.org:id:article:S1368980019001848/resource/name/S1368980019001848supp001.docx)
Supplement: Supplementary file 1 [file S1368980019001848supp001.docx]

**Supplemental material**

Table 1 Mothers’ reasons for consuming lower than desired amounts: hungry season (n=191)1

|  | Millet | Sorghum | Cassava | Green grams | Cowpeas | Groundnuts | Amaranth leaves | | African nightshade | | Spider plant leaves | |
| --- | --- | --- | --- | --- | --- | --- | --- | --- | --- | --- | --- | --- |
| No reason: adequate consumption | 36 | 43 | 38 | 50 | 16 | 44 | 64 | 32 | | 33 | |
| Cost | 26 | 21 | 16 | 31 | 12 | 27 | 3 | 9 | | 4 | |
| Not available | 21 | 15 | 27 | 13 | 48 | 20 | 20 | 40 | | 36 | |
| Not Tasty | 13 | 15 | 14 | 4 | 11 | 3 | 9 | 15 | | 20 | |
| Health reasons | 2 | 1 | 2 | 1 | 1 | 4 | 2 | 1 | | 1 | |
| Did not plant | 1 | 2 | 2 | 1 | 1 | 0 | 1 | 1 | | 1 | |
| Not prepared for mother | 0 | 1 | 0 | 0 | 0 | 0 | 0 | 0 | | 0 | |
| Not ready for harvest | 0 | 0 | 0 | 0 | 1 | 2 | 0 | 1 | | 1 | |
| Affected by drought | 0 | 0 | 0 | 0 | 2 | 0 | 1 | 1 | | 3 | |
| Never cooked nor eaten | 1 | 1 | 0 | 0 | 4 | 0 | 0 | 0 | | 1 | |
| Not easy to prepare | 0 | 1 | 0 | 0 | 2 | 0 | 0 | 0 | | 0 | |
| Fear it can be poisonous | 0 | 0 | 1 | 0 | 0 | 0 | 0 | 0 | | 0 | |
| Used as seed | 0 | 0 | 0 | 0 | 2 | 0 | 0 | 0 | | 0 | |

1Values represent percent of mothers reporting reason for each food

Table 2 Mothers’ reasons for consuming lower than desired amounts: harvest season (n=168)1

|  | Millet | Sorghum | Cassava | Green grams | Cowpeas | Groundnuts | Amaranth leaves | | African nightshade | | Spider plant leaves | |
| --- | --- | --- | --- | --- | --- | --- | --- | --- | --- | --- | --- | --- |
| No reason: adequate consumption | 30 | 46 | 31 | 42 | 32 | 37 | 59 | 36 | | 34 | |
| Cost | 24 | 10 | 9 | 35 | 11 | 17 | 4 | 4 | | 3 | |
| Not available | 33 | 29 | 46 | 21 | 44 | 35 | 30 | 48 | | 53 | |
| Not Tasty | 11 | 10 | 7 | 1 | 8 | 3 | 7 | 11 | | 9 | |
| Health reasons | 0 | 0 | 1 | 0 | 0 | 2 | 0 | 1 | | 1 | |
| Did not plant | 0 | 0 | 1 | 0 | 0 | 0 | 0 | 0 | | 0 | |
| Not prepared for mother | 1 | 1 | 1 | 0 | 0 | 1 | 0 | 0 | | 0 | |
| Not ready for harvest | 1 | 3 | 3 | 1 | 1 | 5 | 0 | 0 | | 0 | |
| Affected by drought | 0 | 0 | 0 | 0 | 0 | 0 | 0 | 0 | | 0 | |
| Never cooked nor eaten | 0 | 1 | 1 | 0 | 3 | 0 | 0 | 0 | | 0 | |
| Not easy to prepare | 0 | 0 | 0 | 0 | 0 | 0 | 0 | 0 | | 0 | |
| Fear it can be poisonous | 0 | 0 | 0 | 0 | 0 | 0 | 0 | 0 | | 0 | |
| Used as seed | 0 | 0 | 0 | 0 | 1 | 0 | 0 | 0 | | 0 | |

1Values represent percent of mothers reporting reason for each food

Table 3 Mothers’ reasons for children consuming lower than desired amounts: hungry season (n=191)1

|  | Millet | Sorghum | Cassava | Green grams | Cowpeas | Groundnuts | Amaranth leaves | | African nightshade | | Spider plant leaves | |
| --- | --- | --- | --- | --- | --- | --- | --- | --- | --- | --- | --- | --- |
| No reason: adequate Consumption | 39 | 44 | 38 | 48 | 18 | 41 | 62 | 25 | | 26 | |
| Cost | 24 | 17 | 14 | 4 | 12 | 22 | 2 | 9 | | 5 | |
| Not available | 21 | 18 | 26 | 15 | 47 | 18 | 19 | 34 | | 31 | |
| Not Tasty | 13 | 13 | 13 | 0 | 6 | 4 | 10 | 20 | | 27 | |
| Health reasons | 0 | 1 | 1 | 28 | 1 | 7 | 0 | 0 | | 0 | |
| Did not plant | 1 | 2 | 2 | 0 | 1 | 0 | 1 | 1 | | 1 | |
| Not prepared for mother | 0 | 0 | 0 | 0 | 0 | 0 | 0 | 0 | | 0 | |
| Not ready for harvest | 1 | 0 | 1 | 0 | 1 | 4 | 0 | 1 | | 1 | |
| Affected by drought | 0 | 0 | 0 | 1 | 3 | 1 | 2 | 3 | | 4 | |
| Never cooked nor eaten | 1 | 4 | 4 | 4 | 10 | 3 | 4 | 7 | | 5 | |
| Not easy to prepare | 0 | 1 | 0 | 0 | 0 | 0 | 0 | 0 | | 0 | |
| Fear it can be poisonous | 0 | 0 | 1 | 0 | 0 | 0 | 0 | 0 | | 0 | |
| Used as seed | 0 | 0 | 0 | 0 | 1 | 0 | 0 | 0 | | 0 | |

1Values represent percent of mothers reporting reason for each food

Table 4 Mothers’ reasons for children consuming lower than desired amounts: harvest season (n=168)1

|  | Millet | Sorghum | Cassava | Green grams | Cowpeas | Groundnuts | Amaranth leaves | | African nightshade | | Spider plant leaves | |
| --- | --- | --- | --- | --- | --- | --- | --- | --- | --- | --- | --- | --- |
| No reason: adequate Consumption | 32 | 50 | 33 | 42 | 28 | 35 | 61 | 29 | | 31 | |
| Cost | 20 | 9 | 8 | 29 | 10 | 15 | 2 | 4 | | 3 | |
| Not available | 33 | 26 | 42 | 23 | 44 | 33 | 29 | 45 | | 45 | |
| Not Tasty | 7 | 4 | 9 | 2 | 6 | 4 | 6 | 14 | | 15 | |
| Health reasons | 2 | 0 | 0 | 0 | 0 | 4 | 0 | 2 | | 1 | |
| Did not plant | 1 | 2 | 2 | 1 | 0 | 1 | 1 | 2 | | 1 | |
| Not prepared for mother | 0 | 0 | 0 | 0 | 0 | 0 | 0 | 0 | | 0 | |
| Not ready for harvest | 1 | 2 | 3 | 1 | 1 | 7 | 0 | 0 | | 0 | |
| Affected by drought | 0 | 0 | 0 | 0 | 1 | 0 | 0 | 0 | | 0 | |
| Never cooked nor eaten | 4 | 7 | 3 | 2 | 8 | 1 | 1 | 4 | | 4 | |
| Not easy to prepare | 0 | 0 | 0 | 0 | 0 | 0 | 0 | 0 | | 0 | |
| Fear it can be poisonous | 0 | 0 | 0 | 0 | 0 | 0 | 0 | 0 | | 0 | |
| Used as seed | 0 | 0 | 0 | 0 | 2 | 0 | 0 | 0 | | 0 | |

1Values represent percent of mothers reporting reason for each food
